# Supplementary material
Source: PubMed Central journal article supplement (PMC7323848)
Supplement: NIHMS1598807-supplement-1.pdf [file NIHMS1598807-supplement-1.pdf]

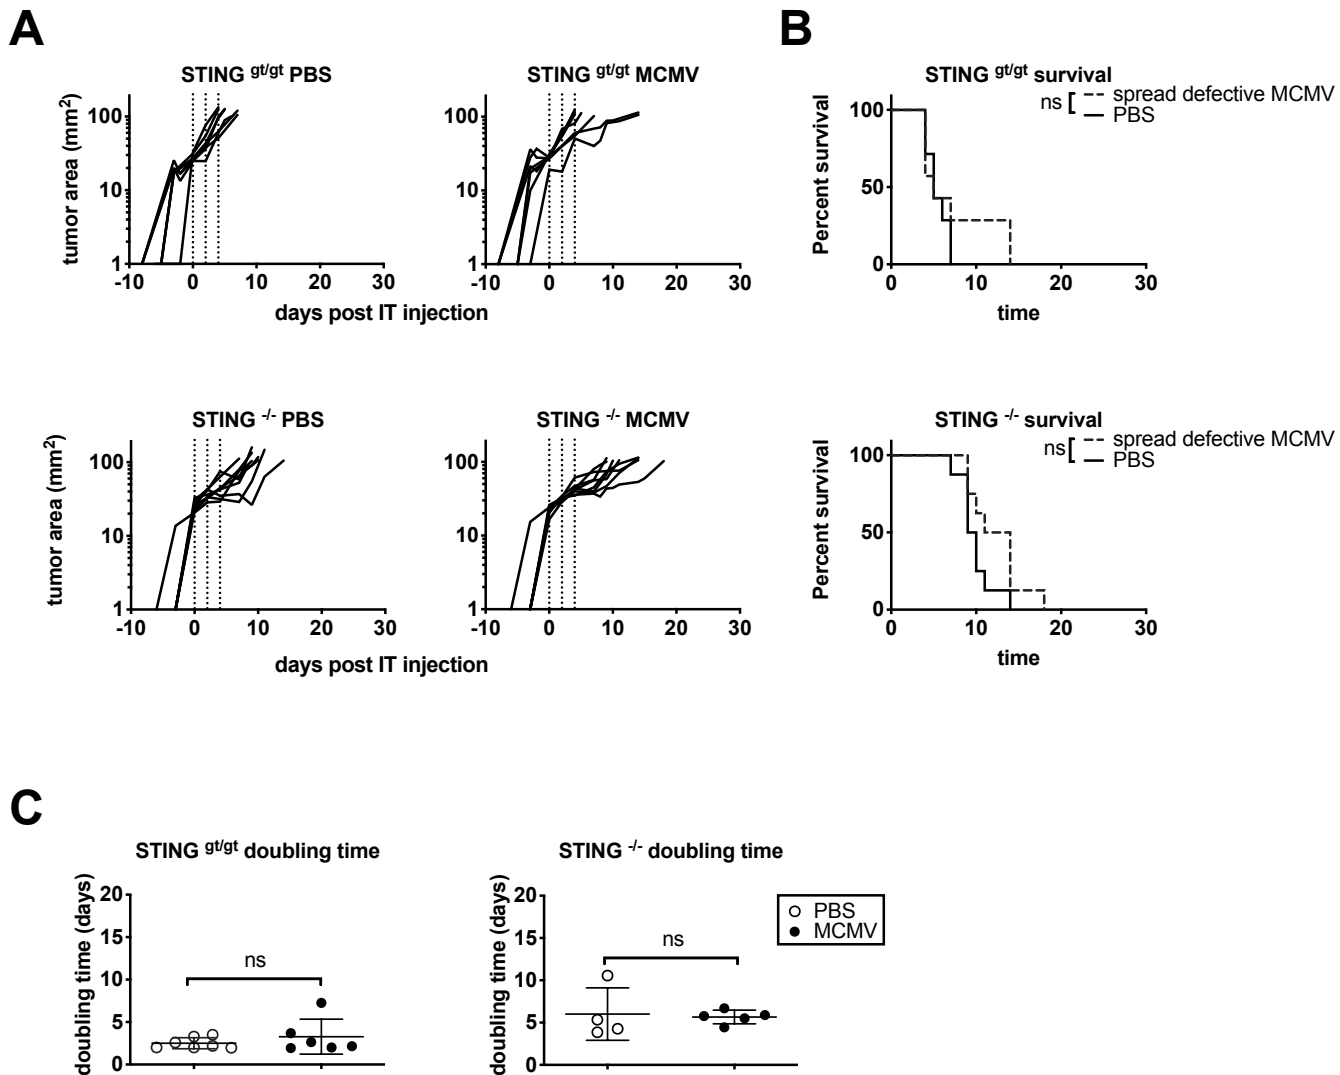

**Supplemental Figure 1.** Neither STING<sup>-/-</sup> nor STING<sup>g<sup>t</sup>/g<sup>t</sup></sup> animals display anti-tumor effects after i.t. MCMV injections. **A)** Tracings show B16-F0 tumor growth on a logarithmic scale after PBS or ΔgL-MCMV was intratumorally injected into STING<sup>g<sup>t</sup>/g<sup>t</sup></sup> (golden ticket) animals (PBS n=7, MCMV n=7) or STING<sup>-/-</sup> (PBS n=8, MCMV n=8) animals. Dotted lines indicate the days in which animals received i.t. injections of ΔgL-MCMV or PBS. Percent survival **(B)** and doubling times **(C)** were also assessed and shown to have no significant differences when using the logrank test for **B** and the two-tailed t test for **C**.

**A**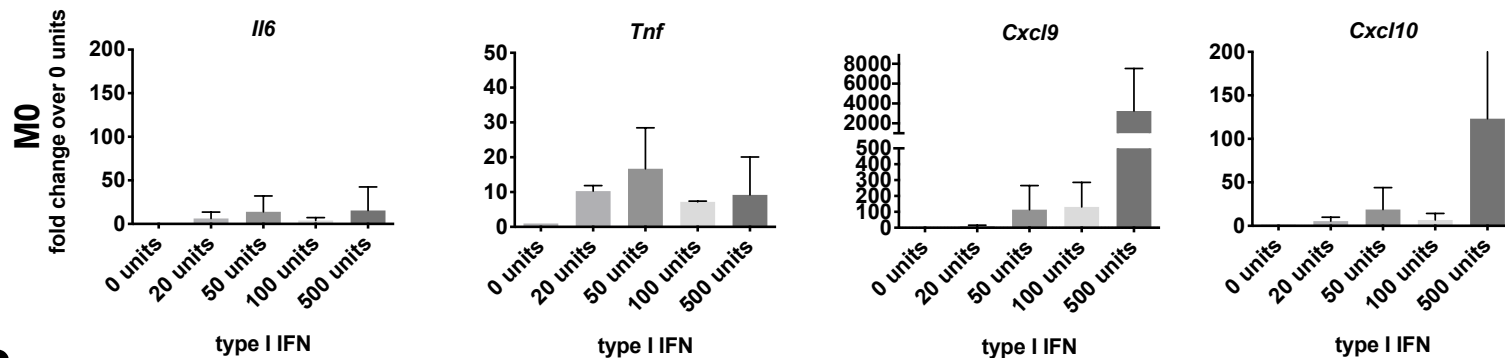**B**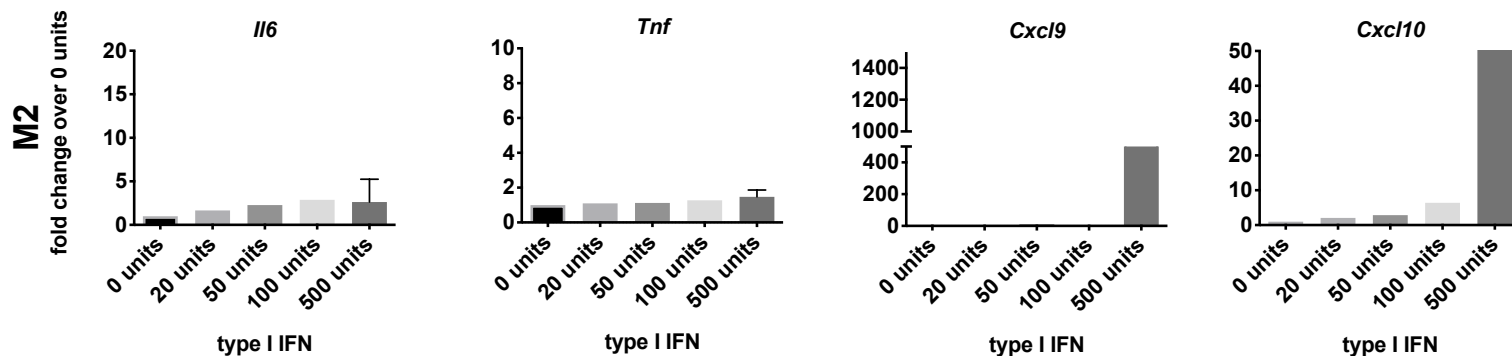

**Supplemental Figure 2.** Type I IFN titrations on M0 and M2 macrophages. Type I IFN was titrated on M0 (**A**) and M2 (**B**) macrophages at increasing concentrations of 0 units (M0 n=5, M2 n=5), 20 units (M0 n=2, M2 n=1), 50 units (M0 n=2, M2 n=1), 100 units (M0 n=2, M2 n=1), and 500 units (M0 n=5, M2 n=5). Data are shown as fold change over untreated (0 units) macrophages.

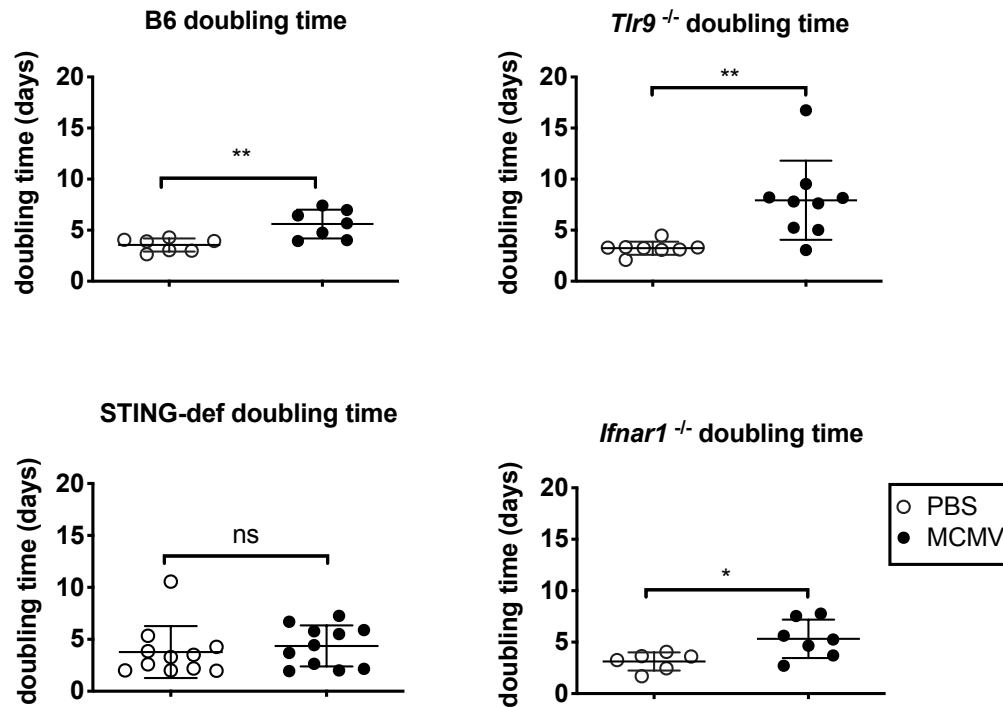

**Supplemental Figure 3.** Tumor doubling times are not increased in STING-def animals after i.t. MCMV. Tumor doubling times are shown for B16-F0 tumors treated with PBS or  $\Delta$ gL-MCMV in WT B6 (PBS n=7, MCMV n=7), *Tlr9*<sup>-/-</sup> (PBS n=8, MCMV n=9), *Ifnar1*<sup>-/-</sup> (PBS n=6, MCMV n=7), and STING-def (PBS n=15, MCMV n=15, from *STING*<sup>-/-</sup> and *STING*<sup>g<sup>l</sup>/g<sup>l</sup></sup> combined) animals. Doubling times were calculated starting on the day of the first PBS or  $\Delta$ gL-MCMV to the endpoint of 100mm<sup>2</sup>. Animals were removed from the calculation if they failed to reach the designated endpoint.

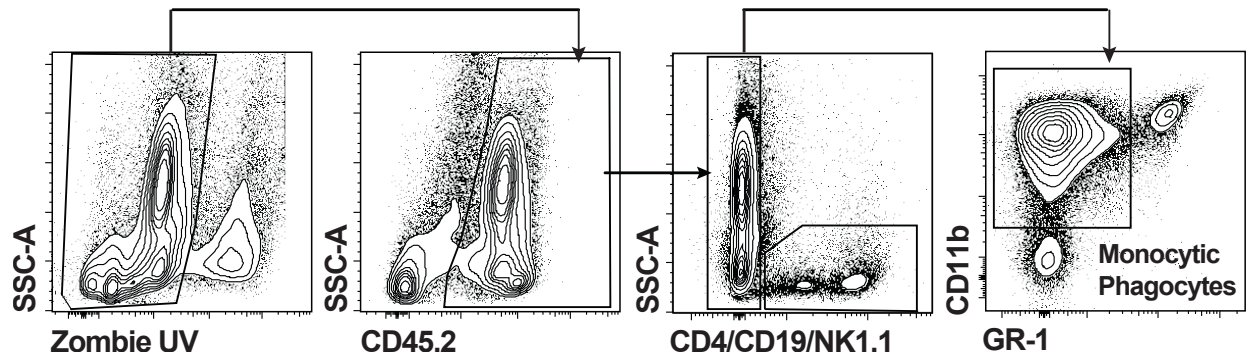

**Supplemental Figure 4.** Representative gating strategy for sorted monocytic phagocytes, shown in Figure 6D.
